# Supplementary material
Source: Research Square preprint supplement (doi:10.21203/rs.3.rs-9547254/v1)
Supplement: Supplementary file 1 [file d3b4ae5a5d67c83c7eb1cb25.docx]

**Supplementary Information**

**Elucidating the Catalytic Activity of Lattice-Distorted Double Perovskite Oxides as Bifunctional Electrocatalysts**

Hyeocksu Kim1, Hak Sakong1, Sang-Hee Park1 and Joohyuk Park1,*

1Department of Chemical Engineering, Changwon National University, Gyeongsangnam-do 51140, Republic of Korea

E-mail: jhpark@changwon.ac.kr

**Table S1** Comparison of ionic radii and coordination environments of constituent ions, with calculated Goldschmidt tolerance factors (t) and estimated crystal structures based on t values for Pr2MnCoO6 and La2MnCoO­6

| **Materials** | **A-site** | **B-site** | **B’-site** | **O-site** | **t** | **Crystal structure** |
| --- | --- | --- | --- | --- | --- | --- |
| Pr2MnCoO6 | Pr3+ (VIII) 1.126 Å | Mn4+ (VI) 0.53 Å | Co2+ (VI) 0.745 Å | O2– (VI) 1.4 Å | 0.877 | Monoclinic |
| La2MnCoO6 | La3+ (VIII) 1.16 Å | Mn4+ (VI) 0.53 Å | Co2+ (VI) 0.745 Å | O2– (VI) 1.4 Å | 0.888 | Monoclinic |

**
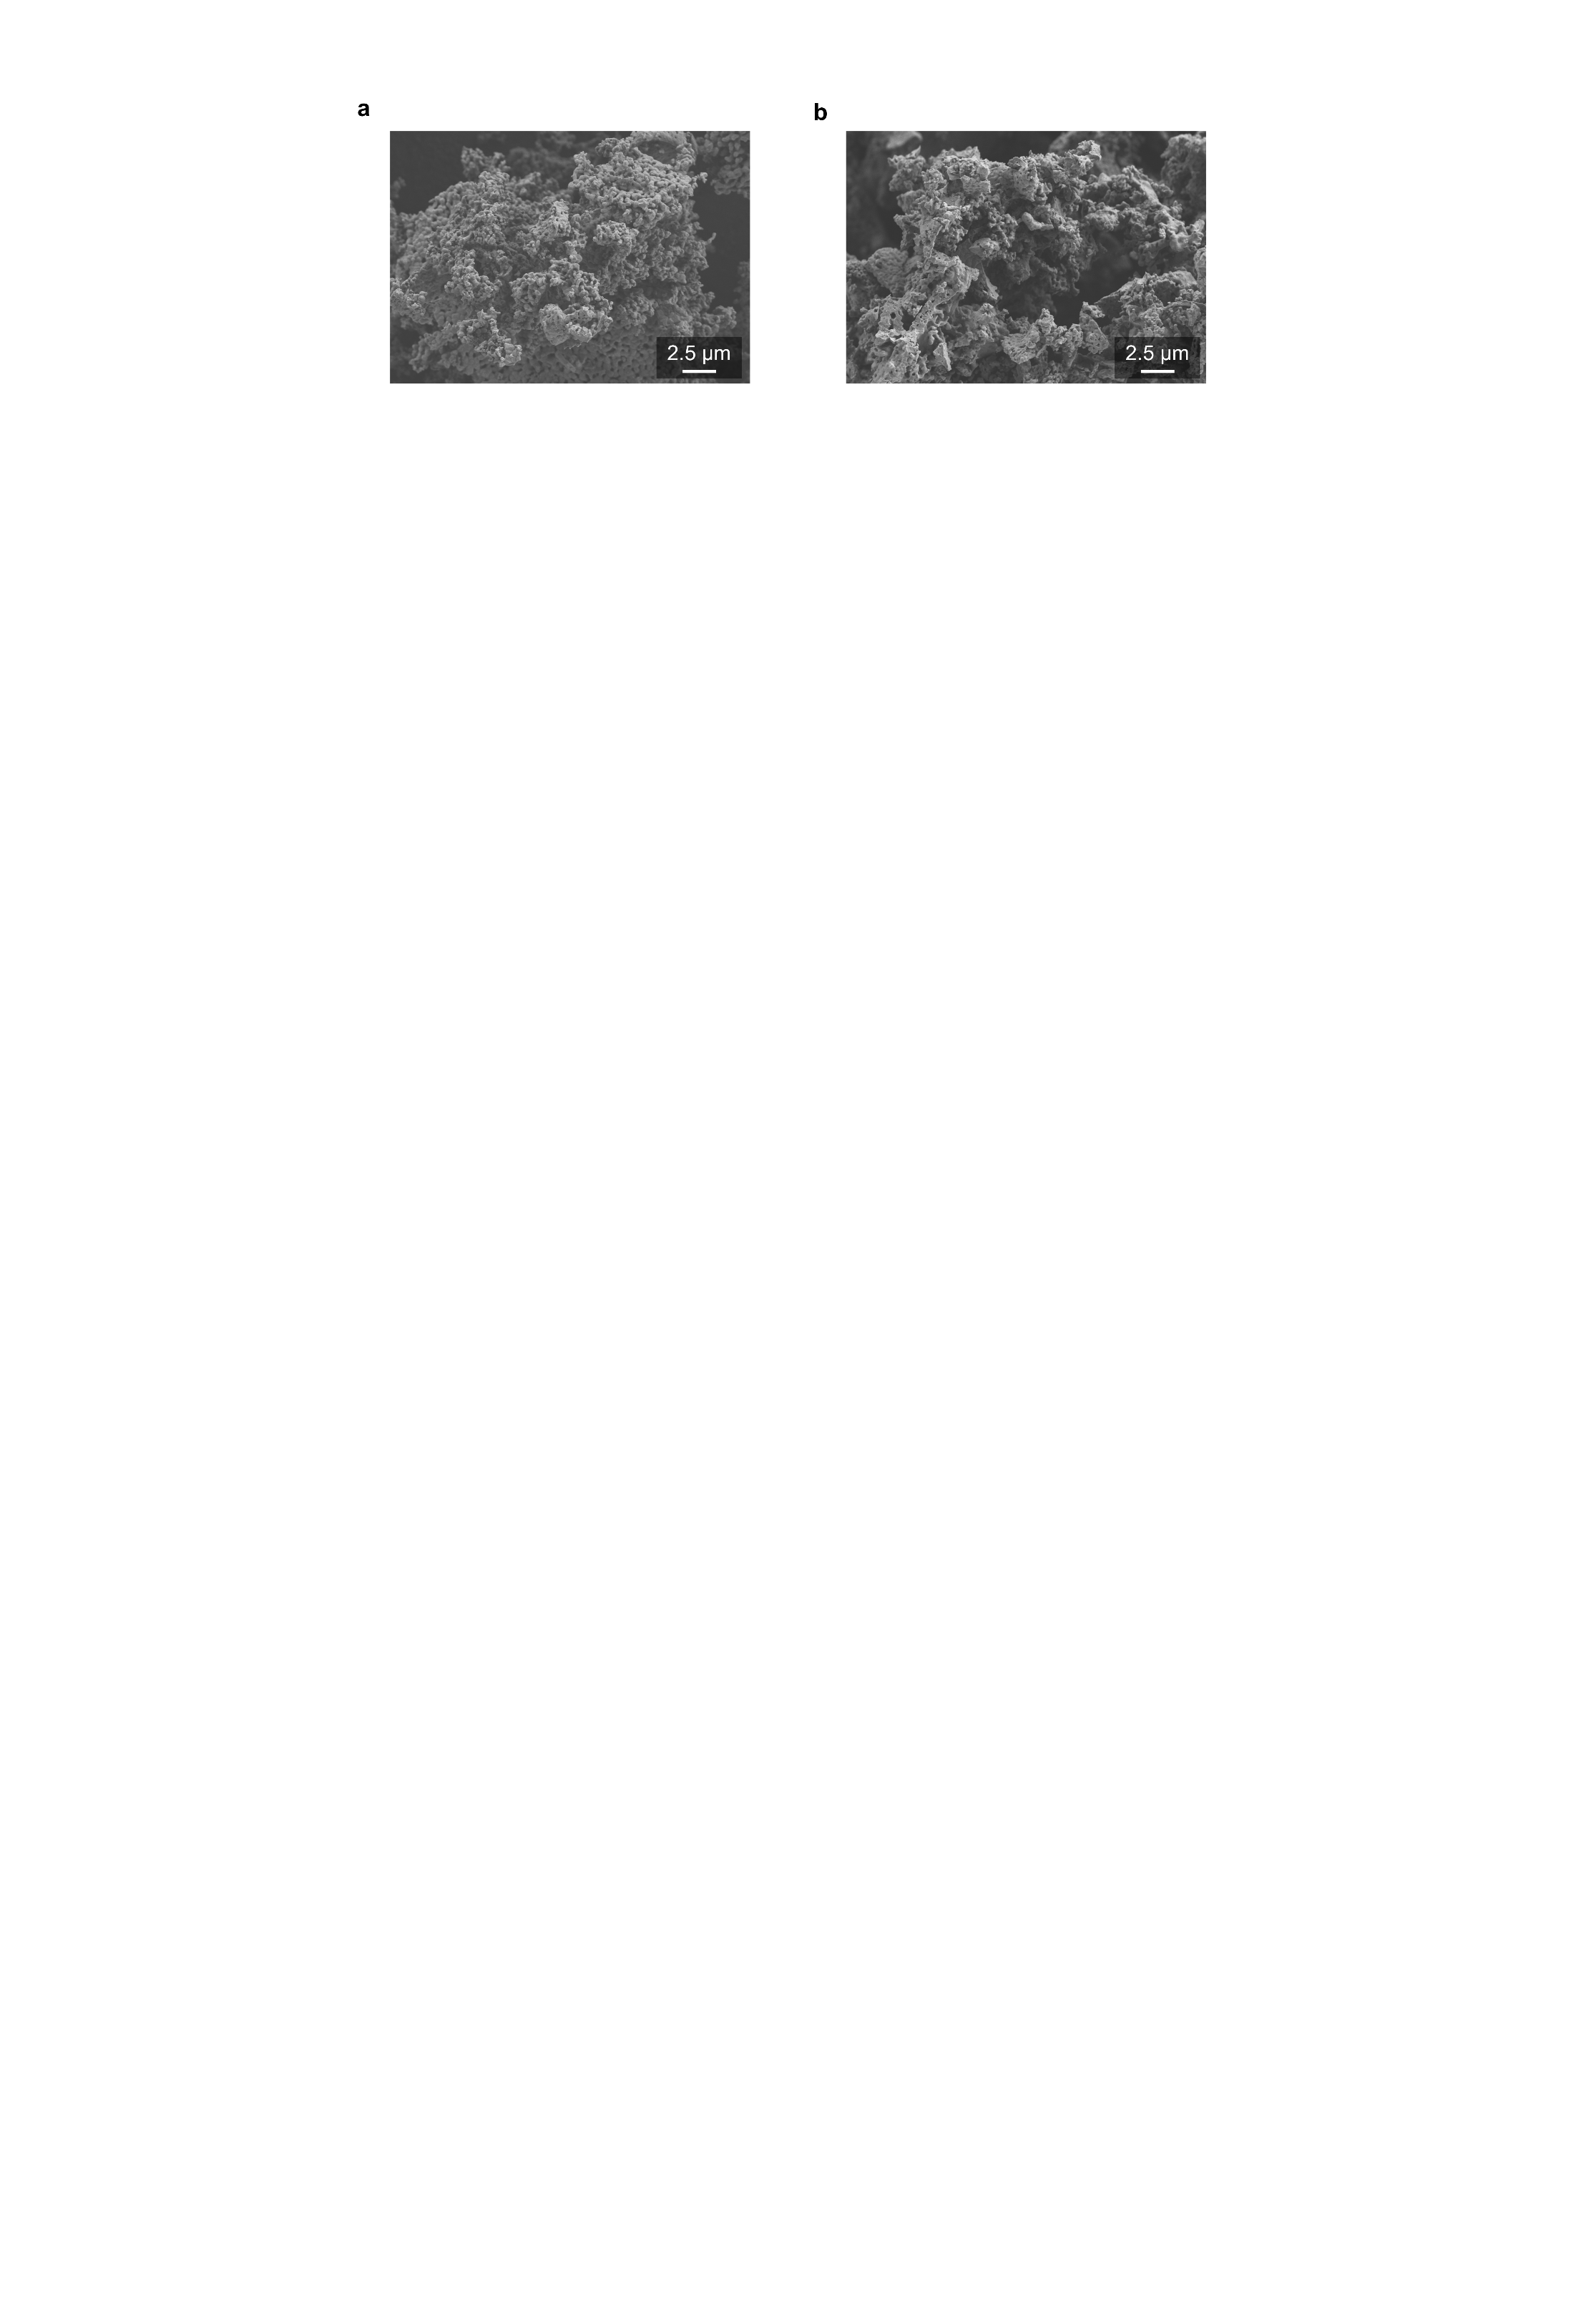
**

**Fig. S1** Wide area SEM images of (**a**) Pr2MnCoO6 and (**b**) La2MnCoO6

**
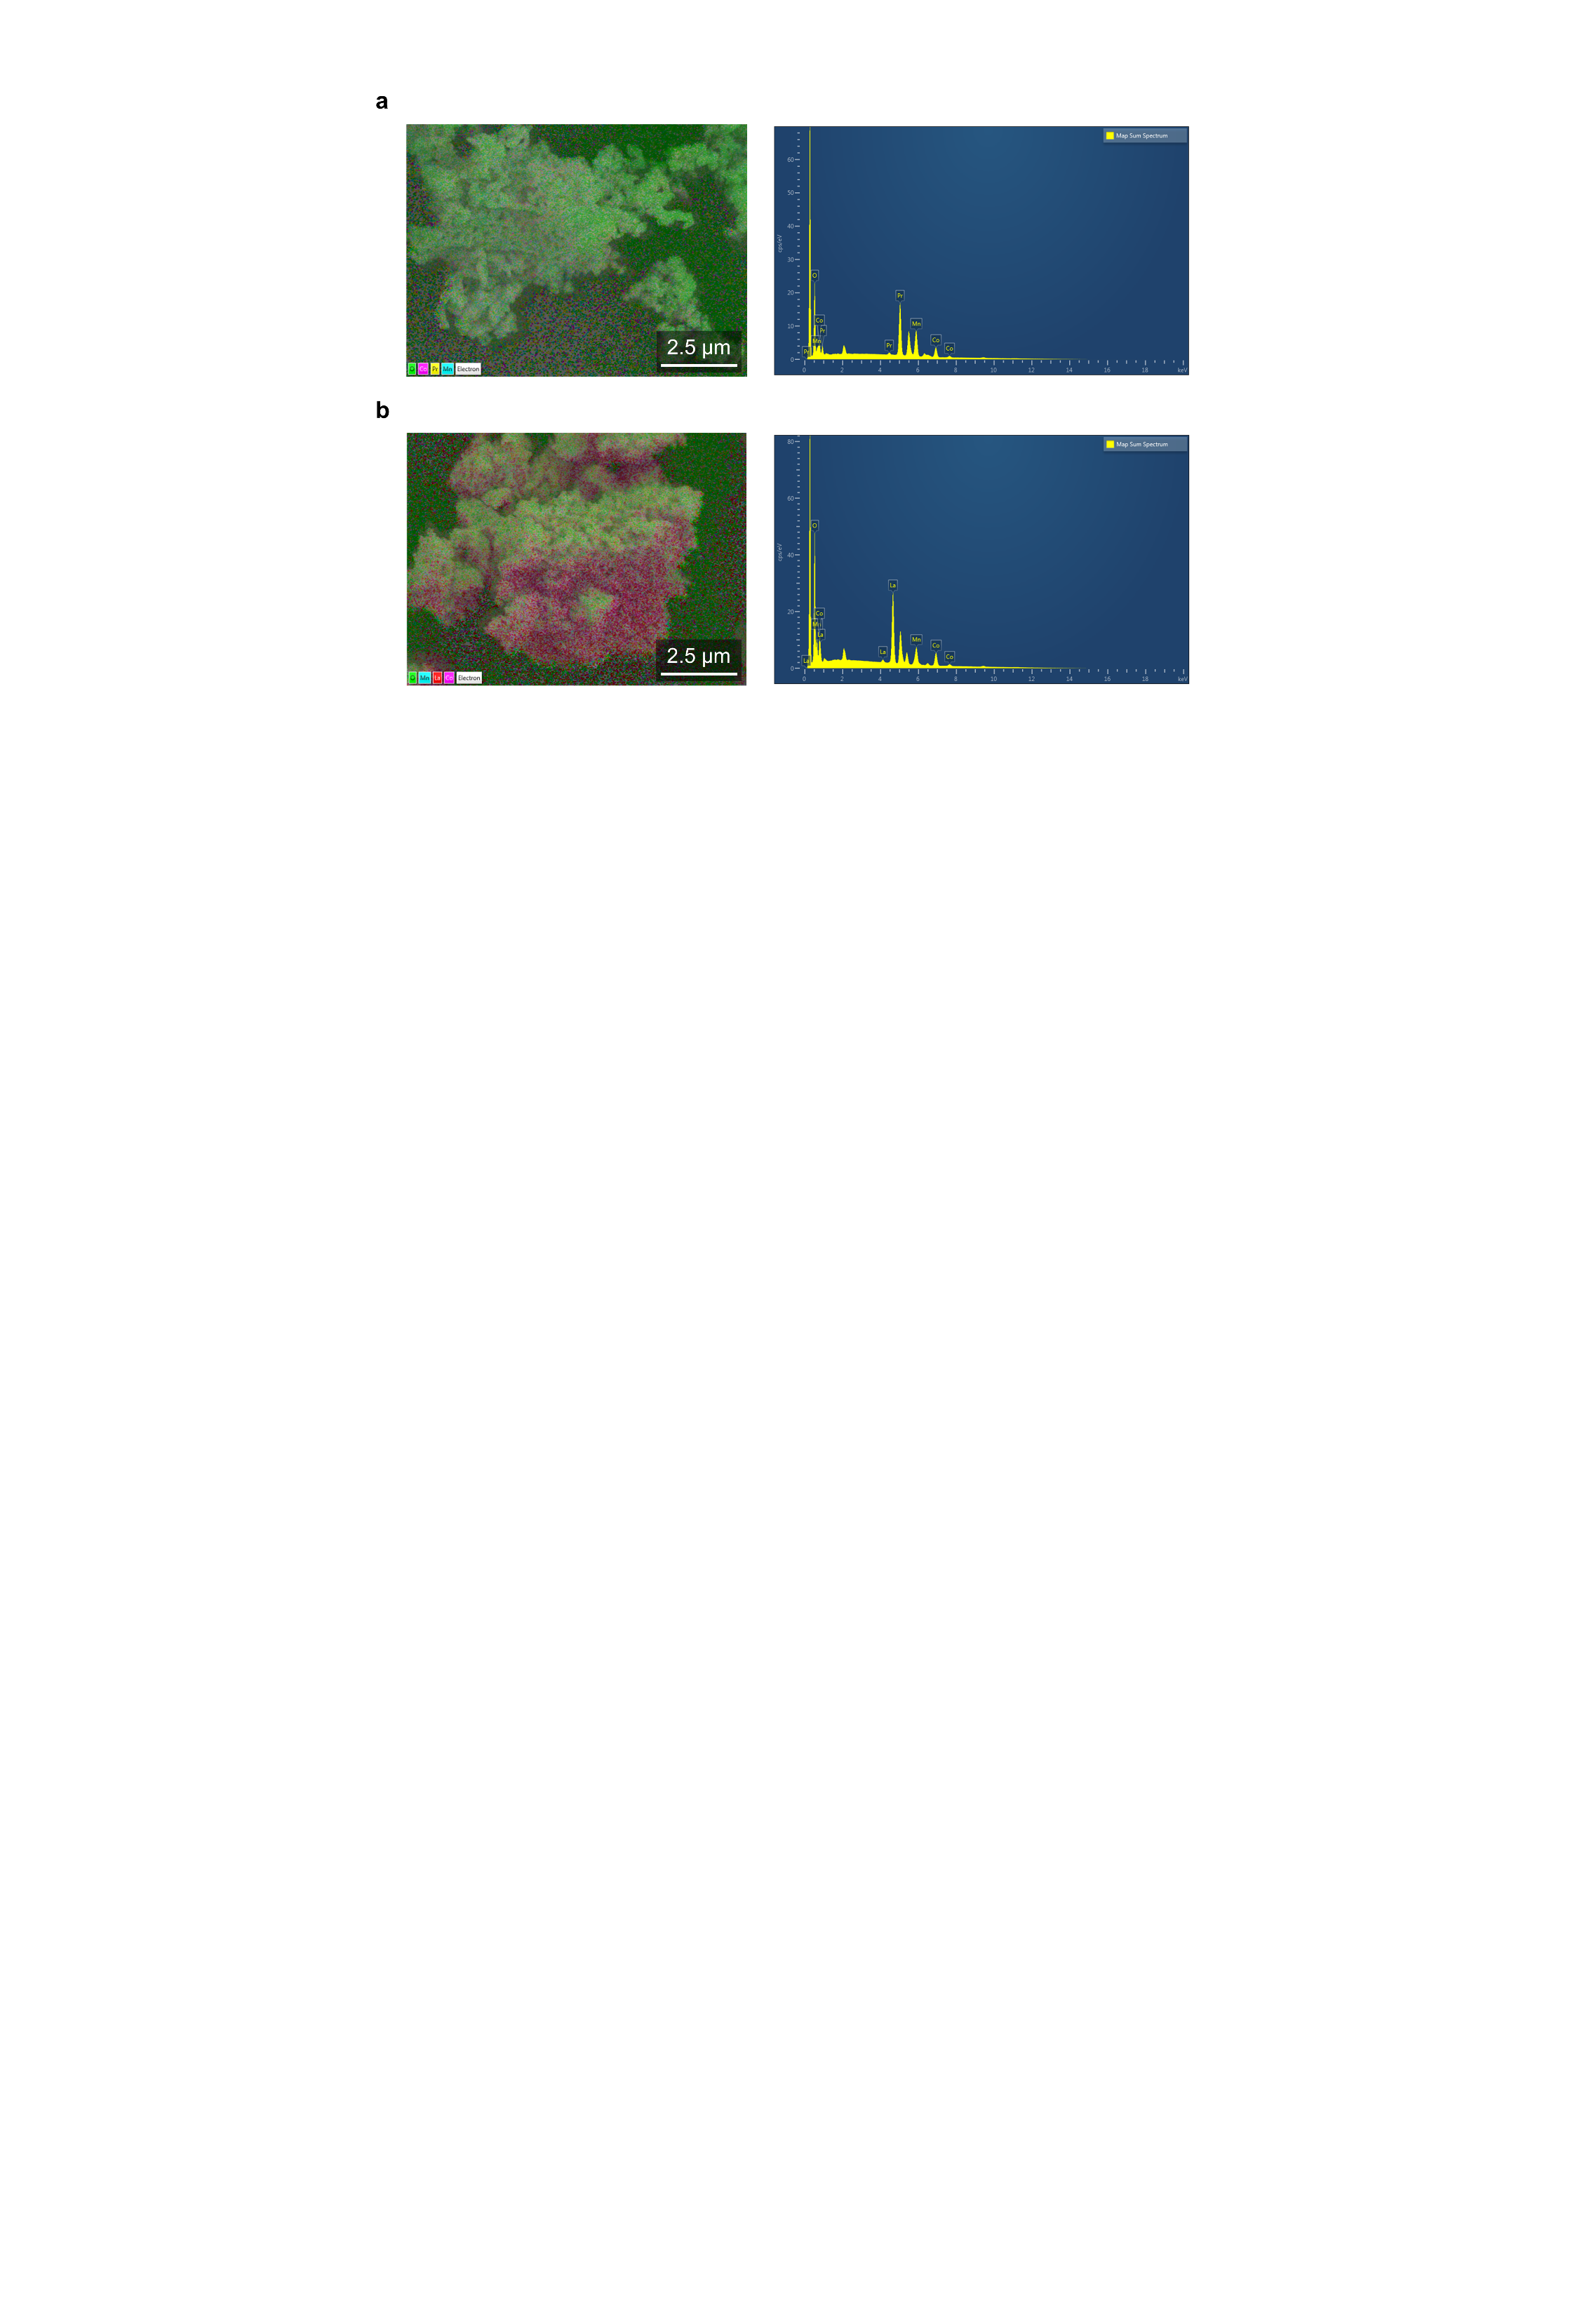
**

**Fig. S2** EDS mapping images and corresponding EDS spectra of (**a**) Pr2MnCoO6 and (**b**) La2MnCoO6. The EDS mapping images show the overall elemental distribution of Pr (or La), Mn, Co and O

**Table S2** The elemental composition of Pr2MnCoO6 and La2MnCoO6 obtained from EDS mapping

| **Materials** | **Element** | **Atomic %** |
| --- | --- | --- |
| Pr2MnCoO6 | Pr | 24.33 |
| Mn | 11.98 |
| Co | 10.14 |
| O | 53.55 |
| Total | 100.00 |
| La2MnCoO6 | La | 20.65 |
| Mn | 8.77 |
| Co | 9.60 |
| O | 60.98 |
| Total | 100.00 |

**
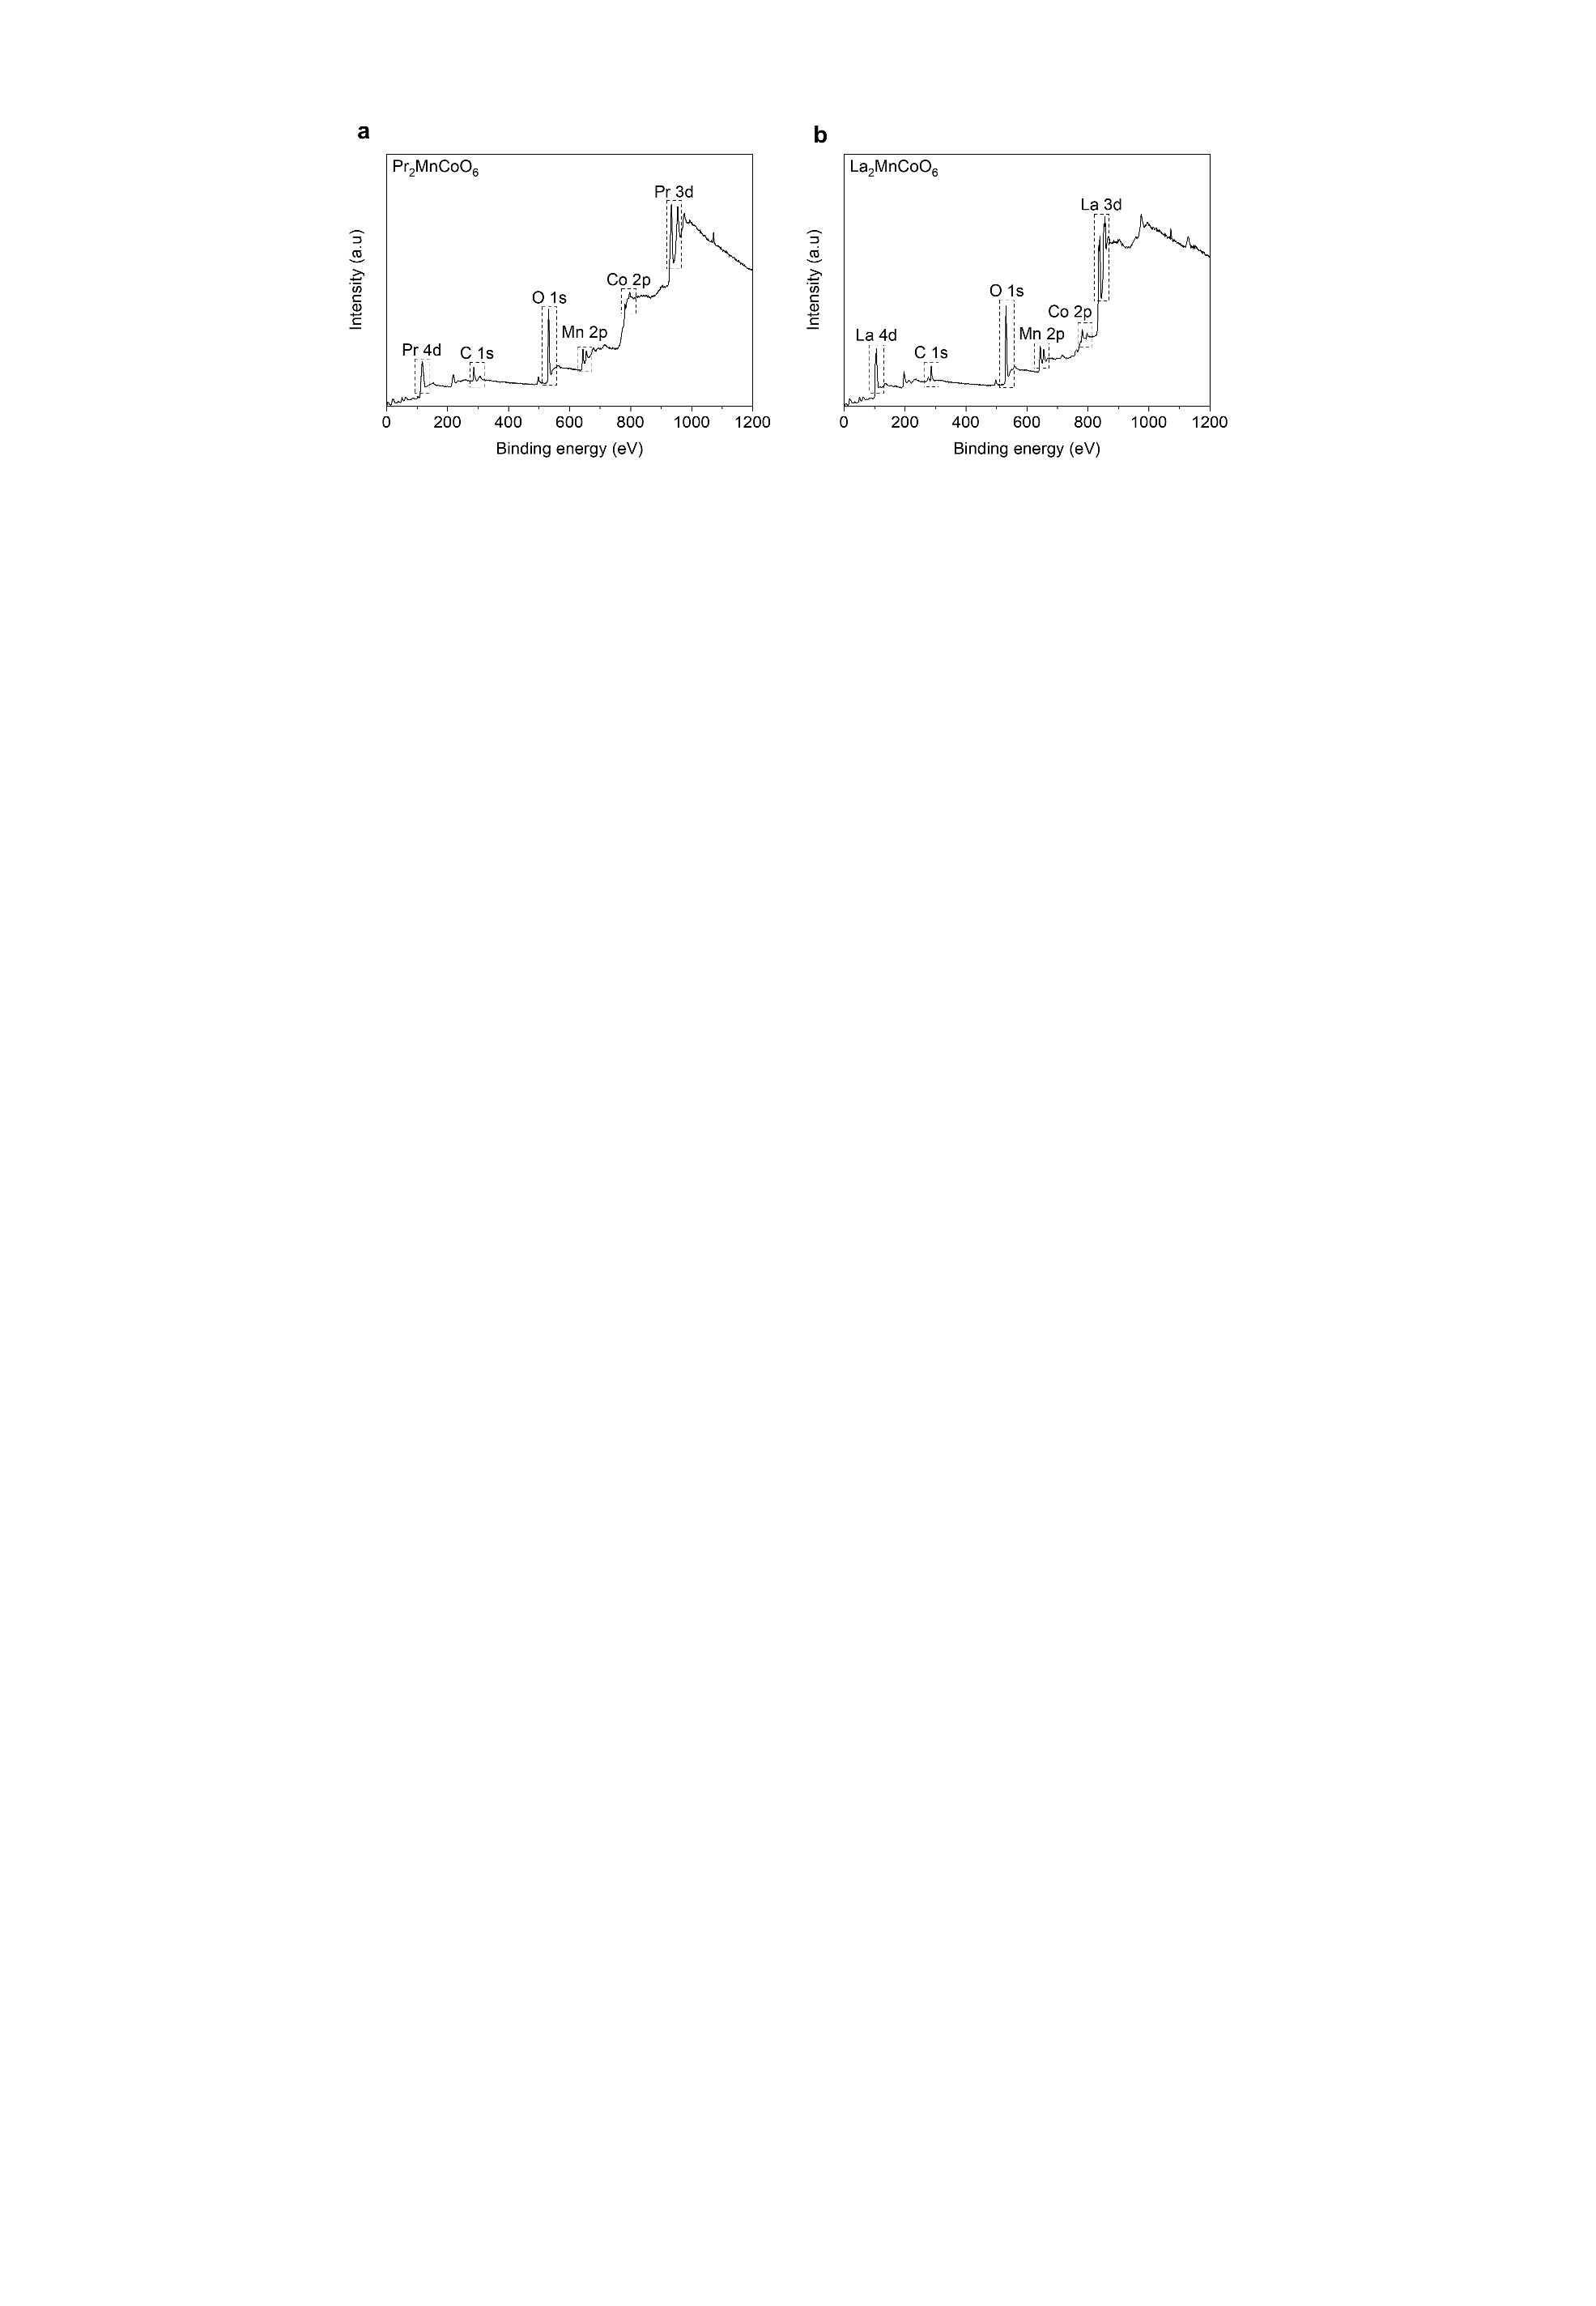
**

**Fig. S3** XPS survey spectra of (**a**) Pr2MnCoO6 and (**b**) La2MnCoO6, showing the characteristic peaks of Pr 3d (or La 3d), Pr 4d (or La 4d), Mn 2p, Co 2p, O 1s and C 1s

**
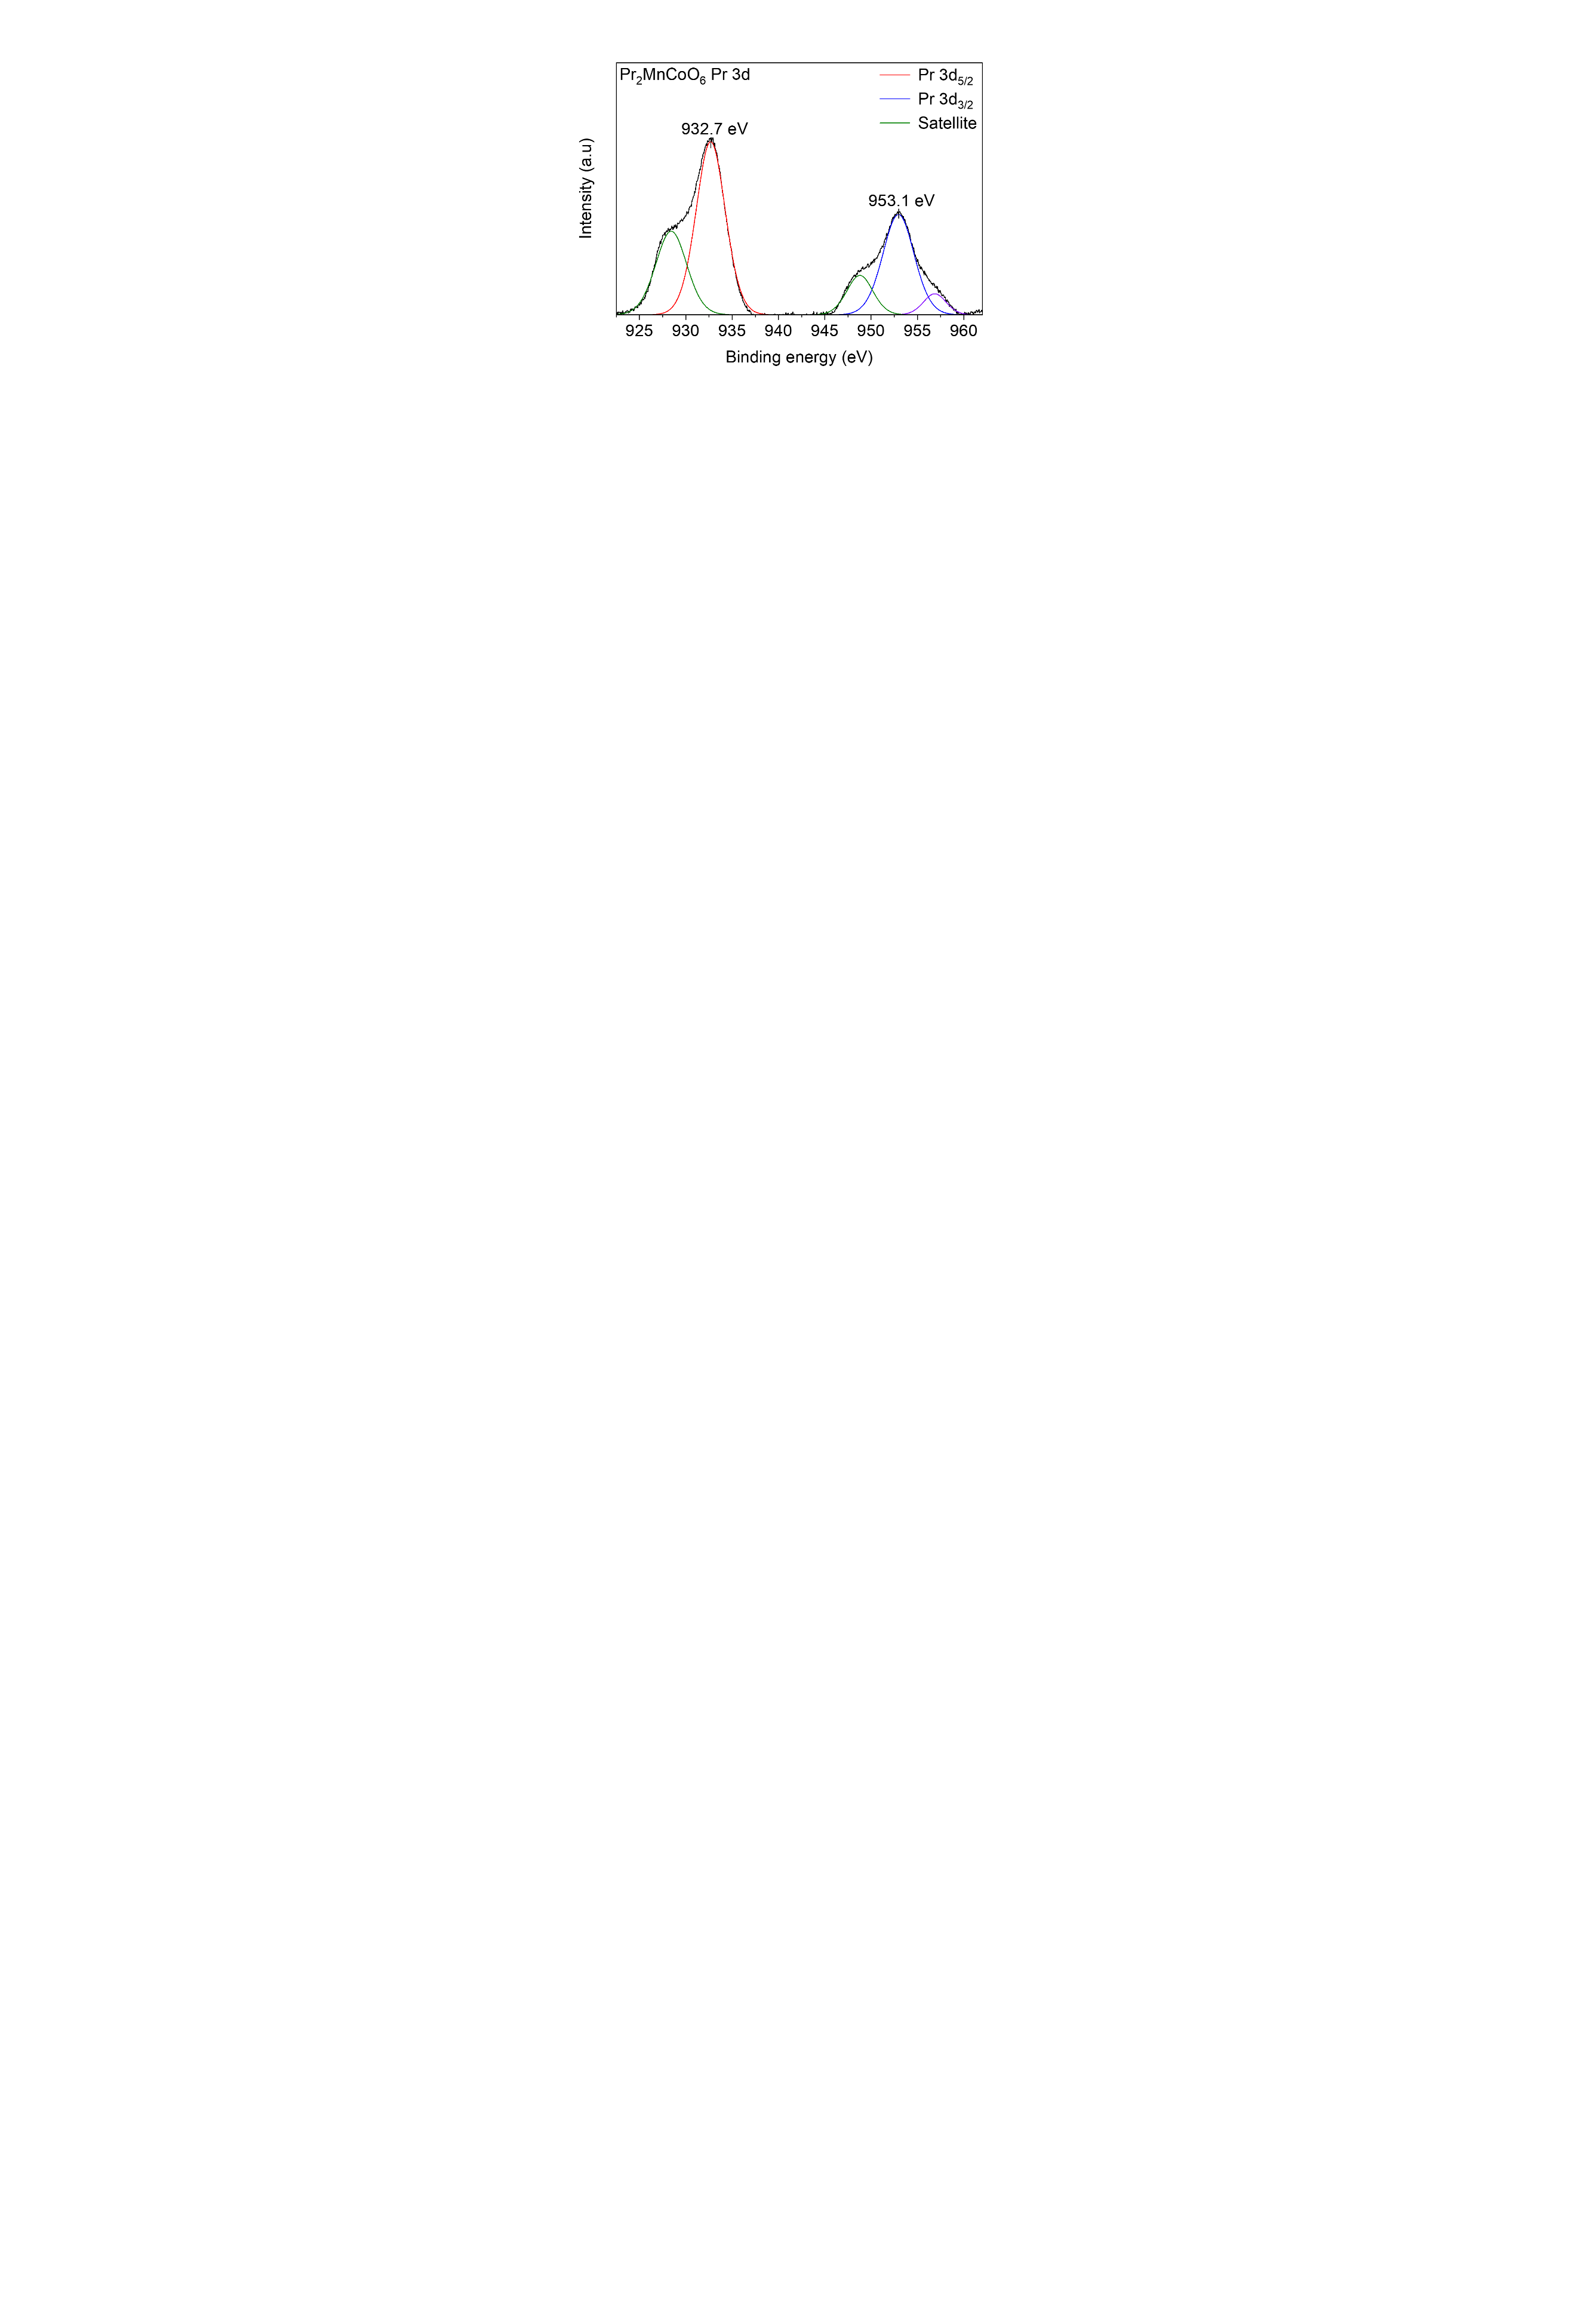
**

**Fig. S4** Pr 3d XPS spectrum of Pr2MnCoO6

**
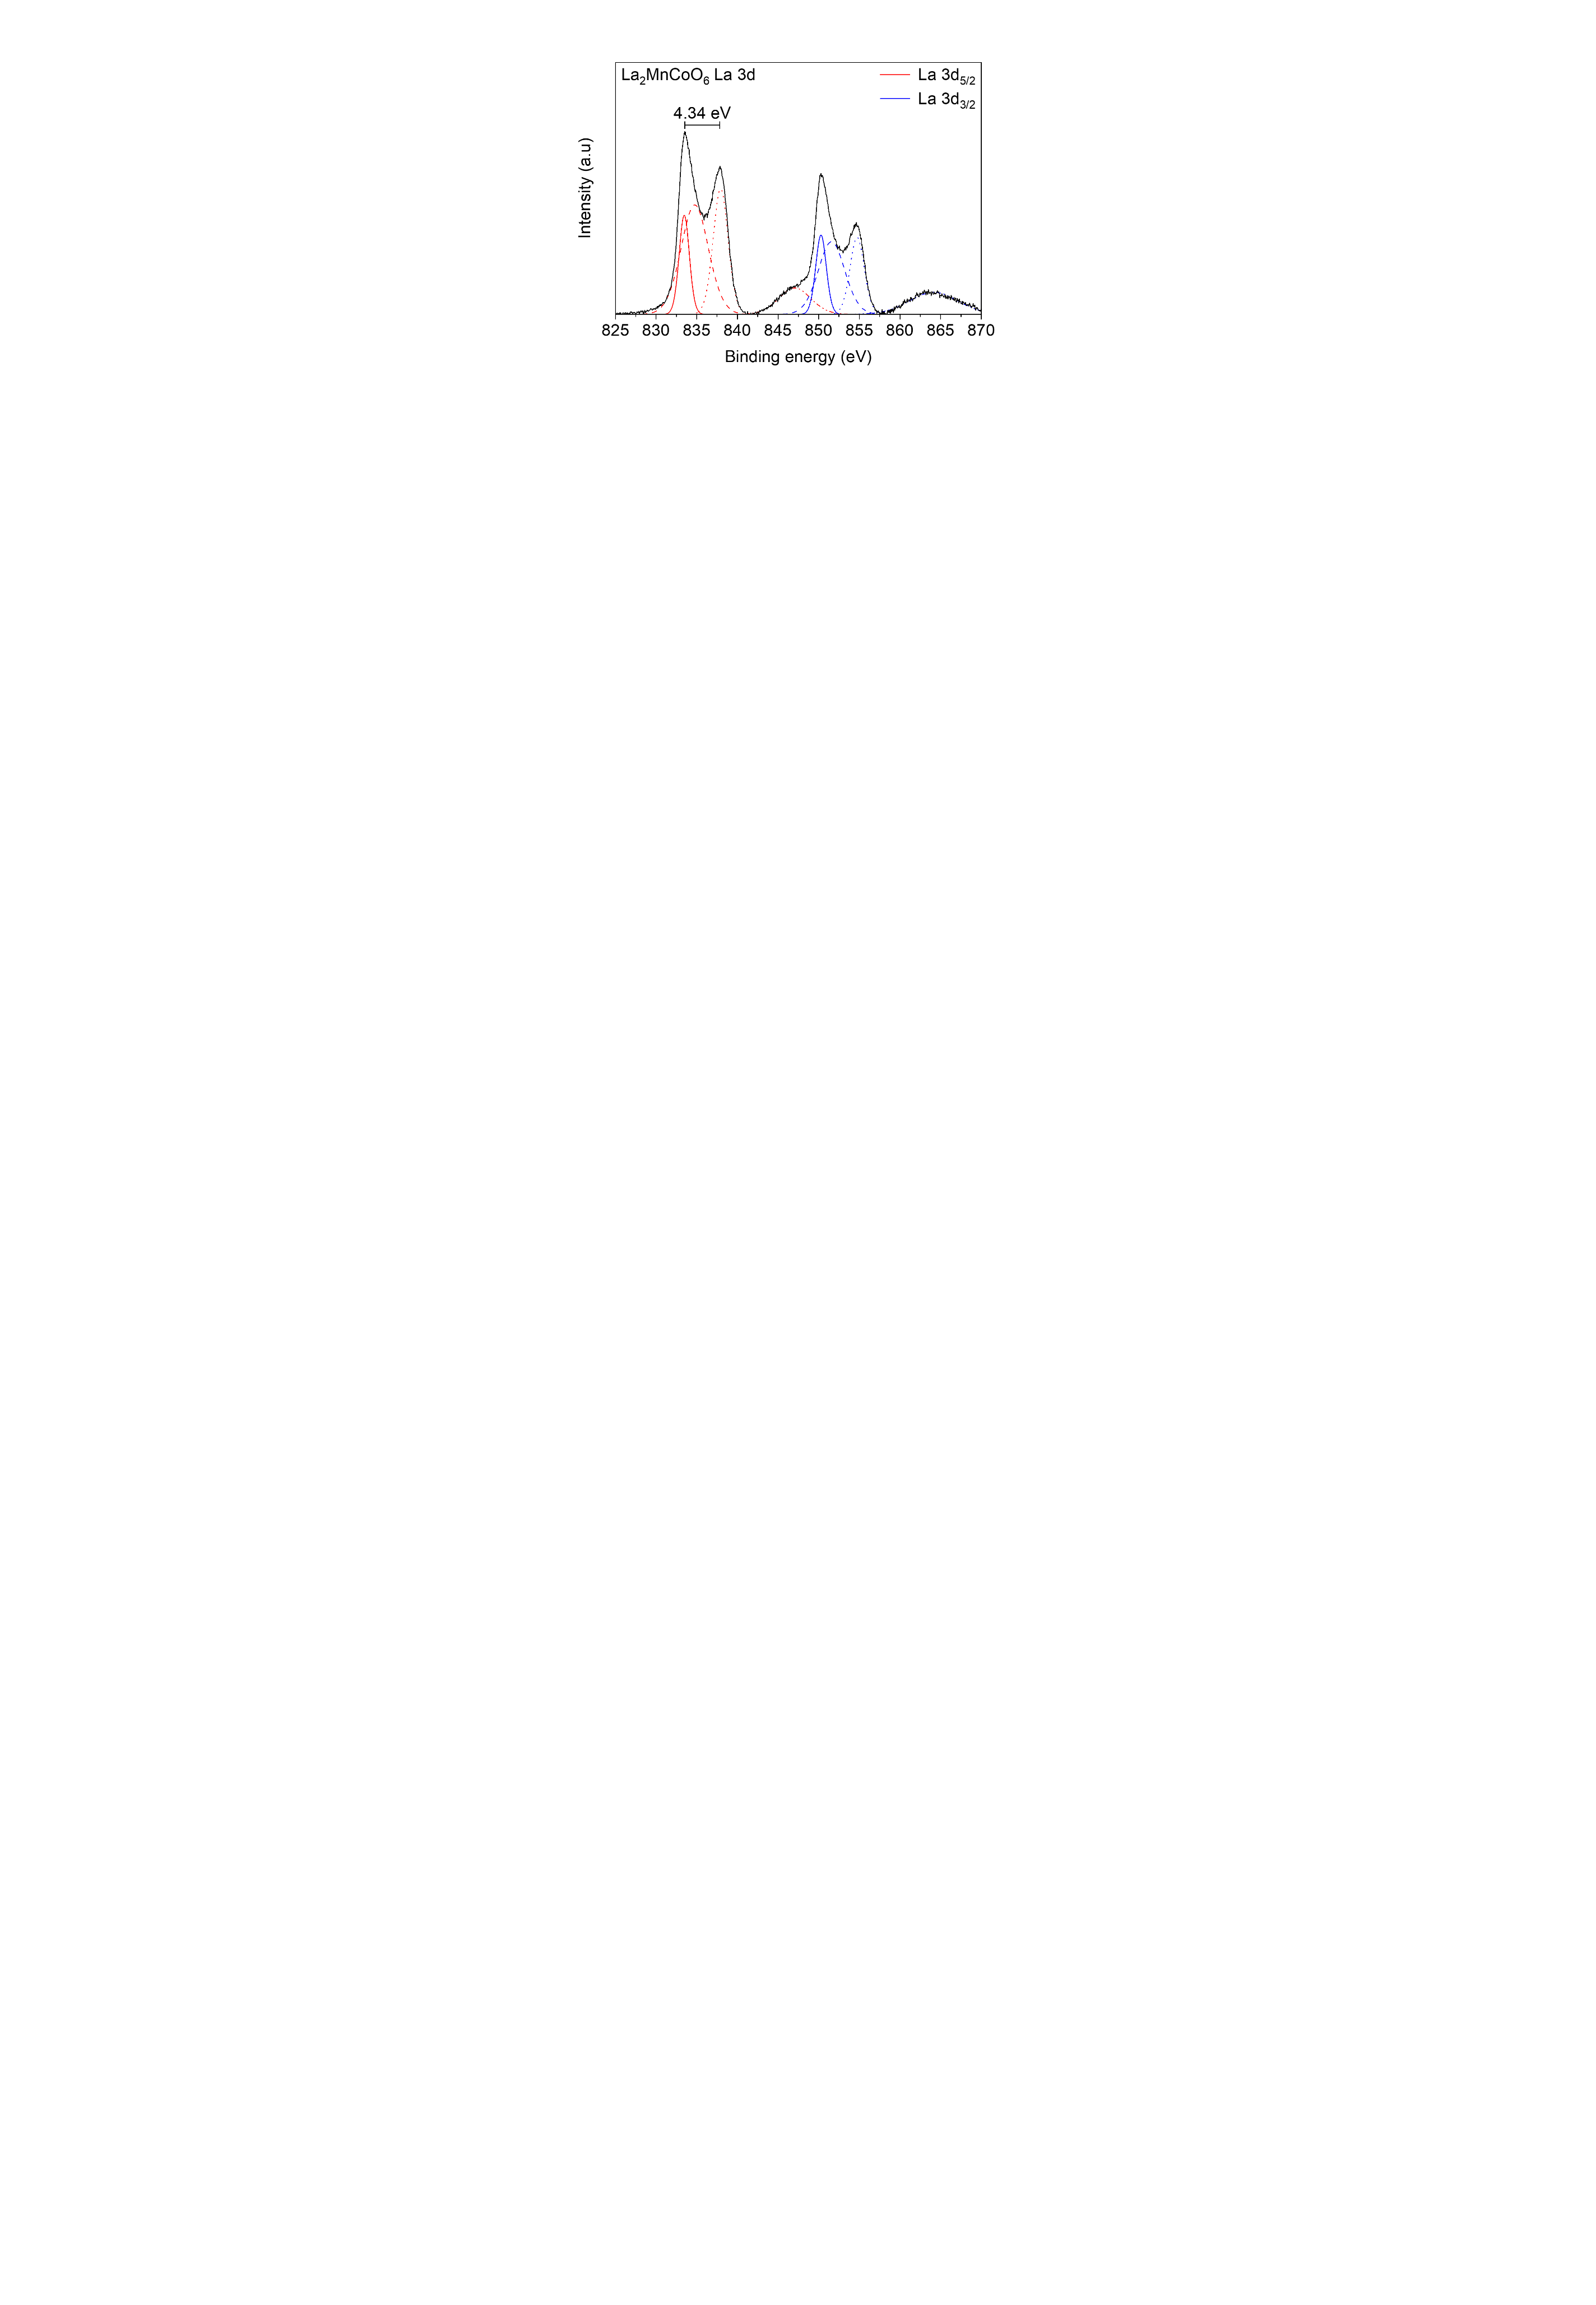
**

**Fig. S5** La 3d XPS spectrum of La2MnCoO6

**Table S3** The relative concentrations and fitting parameters of Pr 3d components for Pr2MnCoO6

| **Materials** | **Component** | **Area** | **FWHM** | **Position (eV)** | **% Conc.** |
| --- | --- | --- | --- | --- | --- |
| Pr2MnCoO6 | Pr 3d5/2 | 138040.5 | 3.707 | 932.68 | 41.06 |
| Pr 3d3/2 | 85856.4 | 3.9782 | 952.95 | 25.54 |
| Satellite | 71063.4 | 3.95182 | 928.42 | 21.14 |
| 28135.8 | 3.3174 | 948.78 | 8.37 |
| 13087.2 | 2.88805 | 956.86 | 3.89 |

**Table S4** The relative concentrations and fitting parameters of La 3d components for La2MnCoO6

| **Materials** | **Component** | **Area** | **FWHM** | **Position (eV)** | **% Conc.** |
| --- | --- | --- | --- | --- | --- |
| La2MnCoO6 | La 3d5/2 | 31636.8 | 1.48206 | 833.46 | 8.67 |
| La 3d5/2 antibonding satellite | 93604.7 | 3.97539 | 834.75 | 25.66 |
| La 3d5/2 bonding satellite | 58452.9 | 2.1619 | 837.94 | 16.02 |
| La 3d5/2 plasmons | 26539.7 | 4.66623 | 847.07 | 7.27 |
| La 3d3/2 | 26290.7 | 1.53986 | 850.28 | 7.21 |
| La 3d3/2 antibonding satellite | 60274.0 | 3.85453 | 851.58 | 16.52 |
| La 3d3/2 bonding satellite | 34362.9 | 2.07153 | 854.73 | 9.42 |
| La 3d3/2 plasmons | 33670.3 | 7.05614 | 864.15 | 9.23 |

**Table S5** The relative concentrations and fitting parameters of O 1s components for Pr2MnCoO6 and La2MnCoO6

| **Materials** | **Component** | **Area** | **FWHM** | **Position (eV)** | **% Conc.** |
| --- | --- | --- | --- | --- | --- |
| Pr2MnCoO6 | O2– | 35107.0 | 0.9782 | 528.9883 | 39.34 |
| O22–/O– | 19138.9 | 1.87936 | 529.9894 | 21.45 |
| O2/OH– | 27965.2 | 1.71679 | 531.1593 | 31.34 |
| H2O | 7026.0 | 1.89044 | 532.4922 | 7.87 |
| La2MnCoO6 | O2– | 40090.1 | 0.983187 | 529.0655 | 47.38 |
| O22–/O– | 6889.8 | 1.19224 | 529.8463 | 8.14 |
| O2/OH– | 27663.6 | 1.71109 | 531.0116 | 32.69 |
| H2O | 9967.9 | 2.22063 | 532.3073 | 11.78 |

**Table S6** The relative concentrations and fitting parameters of Mn 2p components for Pr2MnCoO6 and La2MnCoO6

| **Materials** | **Component** | **Area** | **FWHM** | **Position (eV)** | **% Conc.** |
| --- | --- | --- | --- | --- | --- |
| Pr2MnCoO6 | 2p3/2 Mn3+ | 14034.5 | 2.31052 | 641.4126 | 32.96 |
| 2p3/2 Mn4+ | 12559.7 | 3.46861 | 642.9254 | 29.49 |
| 2p1/2 Mn3+ | 13936.4 | 3.06034 | 653.2083 | 32.73 |
| 2p1/2 Mn4+ | 2053.4 | 3.32239 | 656.2487 | 4.82 |
| La2MnCoO6 | 2p3/2 Mn3+ | 15748.2 | 2.40876 | 641.3067 | 32.19 |
| 2p3/2 Mn4+ | 14822.2 | 3.54251 | 642.8324 | 30.29 |
| 2p1/2 Mn3+ | 15063.7 | 3.00984 | 653.2226 | 30.79 |
| 2p1/2 Mn4+ | 3296.1 | 3.25969 | 655.9247 | 6.73 |

**Table S7** The relative concentrations and fitting parameters of Co 2p components for Pr2MnCoO6 and La2MnCoO6

| **Materials** | **Component** | **Area** | **FWHM** | **Position (eV)** | **% Conc.** |
| --- | --- | --- | --- | --- | --- |
| Pr2MnCoO6 | 2p3/2 Co3+ | 8469.7 | 1.64246 | 779.2204 | 28.86 |
| 2p3/2 Co2+ | 2303.1 | 1.61096 | 780.4628 | 7.85 |
| 2p1/2 Co3+ | 3831.8 | 1.79341 | 795.0446 | 13.06 |
| 2p1/2 Co2+ | 6059.8 | 2.82241 | 796.2471 | 20.65 |
| Satellite | 5424.8 | 4.07229 | 786.6520 | 19.64 |
| 3672.2 | 4.08081 | 802.9032 | 13.30 |
| La2MnCoO6 | 2p3/2 Co3+ | 4967.9 | 1.3855 | 779.3575 | 23.64 |
| 2p3/2 Co2+ | 6639.9 | 2.43285 | 780.6245 | 31.59 |
| 2p1/2 Co3+ | 1928.5 | 1.52746 | 794.9460 | 9.18 |
| 2p1/2 Co2+ | 3699.3 | 2.33776 | 795.9942 | 17.6 |
| Satellite | 1672.4 | 6.26067 | 787.4454 | 7.96 |
| 2109.0 | 4.15138 | 802.9543 | 10.03 |

**
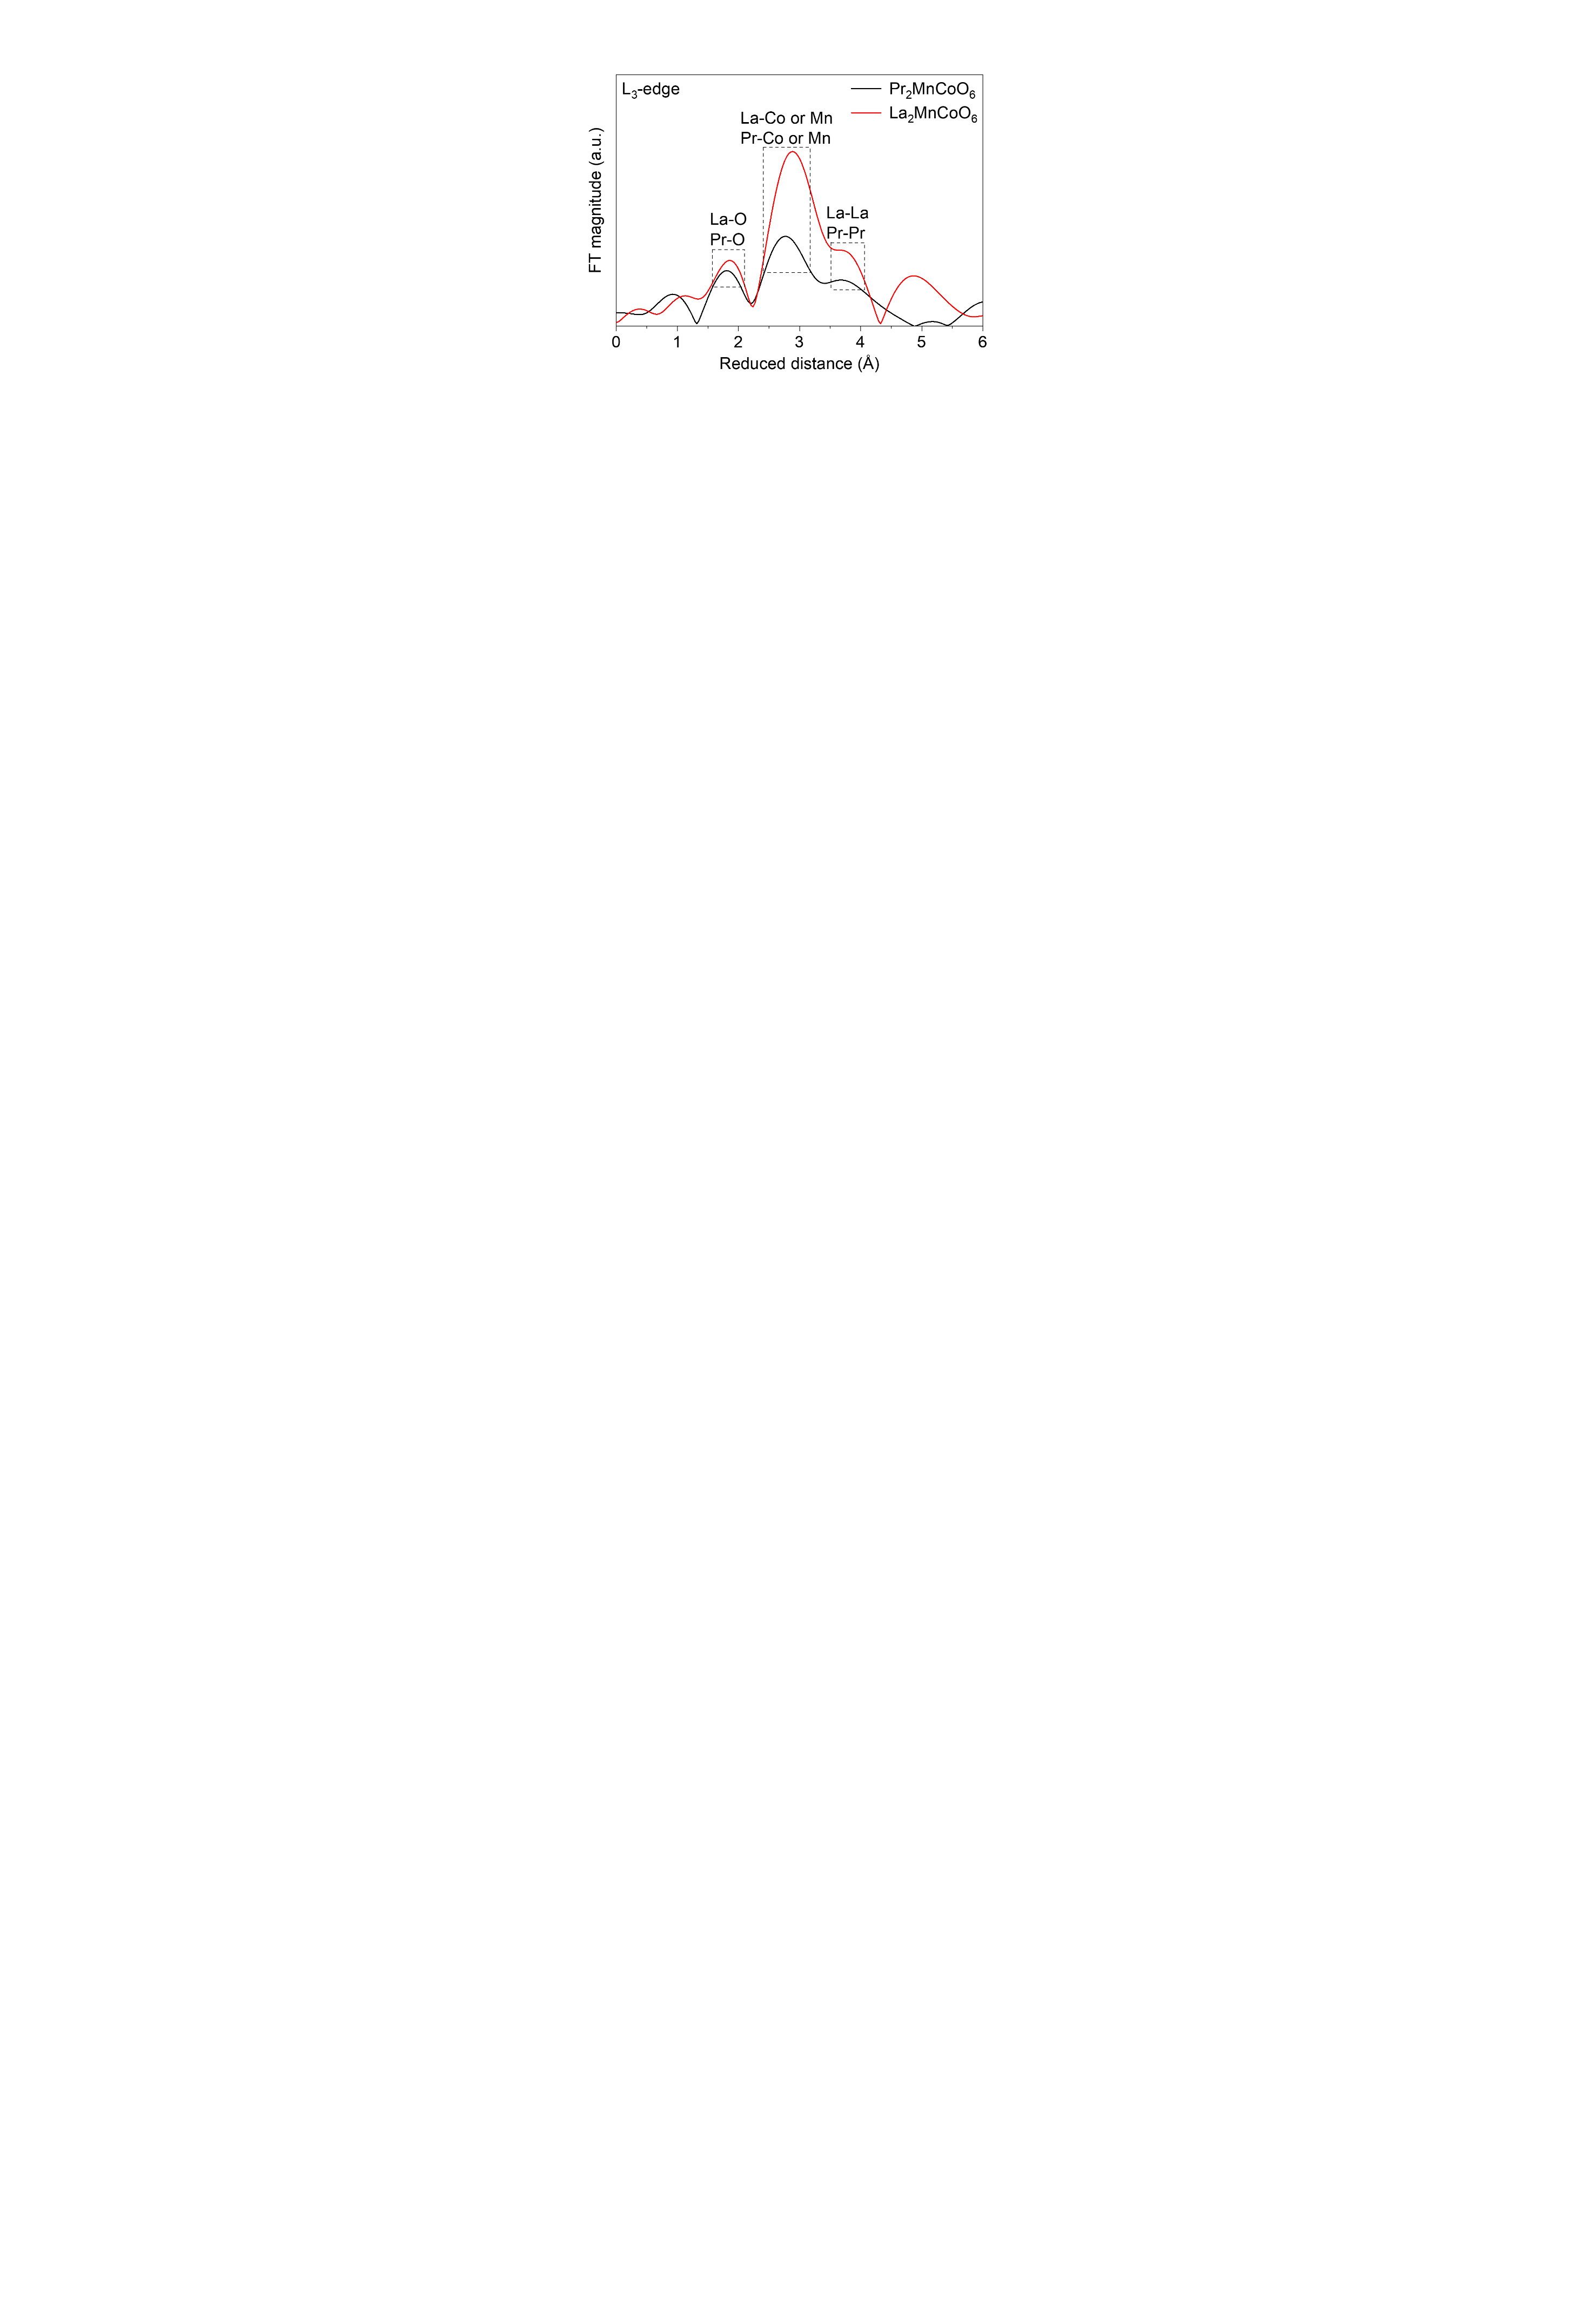
**

**Fig. S6** Fourier-transformed -weighted EXAFS spectra of the Pr L3-edge (Pr2MnCoO6) and La L3-edge (La2MnCoO6)

**Table S8** Comparison of electrocatalytic activities between Pr2MnCoO6, La2MnCoO6 and various perovskite oxides for ORR

| **Catalysts** | **Onset potential (V vs. RHE)** | **Half-wave potential (V vs. RHE)** | **Potential (V vs. RHE) @ mA cm–2** | **Loading mass (mgcat cm–2)** | **Electrolyte /Rotation rate (rpm)** | **Ref.** |
| --- | --- | --- | --- | --- | --- | --- |
| **Pr2MnCoO6** | **0.8** | **0.68** | **–5.89 @ 0.3** | **0.479** | **0.1 M KOH /1600** | **This work** |
| La2MnCoO6 | 0.77 | 0.69 | –4.13 @ 0.3 | 0.479 | 0.1 M KOH /1600 | This work |
| La0.9Ag0.1Co0.7Mn0.3O3 | 0.80 | 0.63 | –4.25 @ 0.0 | 0.150 | 0.1 M KOH /1600 | [1] |
| La0.85Y0.15Ni0.7Fe0.3O3 | 0.75 | 0.63 | –3.8 @ 0.4 | 0.2 | 0.1 M KOH /1600 | [2] |
| LaCo0.8Ru0.2O3 | 0.73 | n/a | –4.75 @ 0.3 | 0.204 | 0.1 M KOH /1600 | [3] |
| SrFe0.25 Co0.25Ni0.25Mo0.25O3−δ | n/a | 0.64 | n/a | 0.232 | 0.1 M KOH /1600 | [4] |
| Bi0.6Ca0.4FeO3 | 0.705 | 0.619 | –5.17 @ 0.2 | n/a | 0.1 M KOH /1600 | [5] |
| La0.95FeO3 | ~0.72 | n/a | ~–5.5 @ 0.2 | 0.232 | 0.1 M KOH /1600 | [6] |
| PrBa0.25Sr0.75Co2O5+ δ | 0.749 | n/a | –4.067 @ 0.2 | 0.328 | 0.1 M KOH /1600 | [7] |
| La1.7Sr0.3Co0.5Ni0.5O4+δ | 0.696 | 0.568 | −4.05 @ 0.15 | 0.232 | 0.1 M KOH /1600 | [8] |

**Table S9** Comparison of electrocatalytic activities between Pr2MnCoO6, La2MnCoO6 and various perovskite oxides for OER

| **Catalysts** | **Onset potential (V vs. RHE)** | **Potential (V vs. RHE) @ mA cm–2** | **Loading mass (mgcat cm–2)** | **Electrolyte /Rotation rate (rpm)** | **Ref.** |
| --- | --- | --- | --- | --- | --- |
| **Pr2MnCoO6** | **1.62** | **1.74 @ 10** | **0.12** | **0.1 M KOH /1600** | **This work** |
| La2MnCoO6 | 1.68 | **-** | 0.12 | 0.1 M KOH /1600 | This work |
| La0.85Y0.15Ni0.7Fe0.3O3 | n/a | 1.74 @ 10 | 0.2 | 0.1 M KOH /1600 | [2] |
| Sr2TiMnO6 | 1.65 | 1.91 @ 5 | 0.102 | 0.1 M KOH /1600 | [9] |
| Ba2Bi0.1Sc0.2Co1.7O6 | n/a | 1.75 @ 5.1 | 0.361 | 0.1 M KOH /1600 | [10] |
| Ba0.5Sr0.5Co0.8Fe0.2O3−δ | n/a | 1.74 @ 10 | 0.25 | 0.1 M KOH /1600 | [11] |
| LaTi0.65Fe0.35O3−δ | n/a | 1.77 @ 10 | n/a | 0.1 M KOH /1600 | [12] |
| La0.6Sr0.4CoO3−δ | n/a | 1.83 @ 10 | n/a | 0.1 M KOH /1600 | [13] |
| LaNi0.85Mg0.15O3 | n/a | 1.86 @ 10 | 0.2 | 0.1 M KOH /1600 | [14] |
| Co-dope LaMnO3/NCNT | n/a | 1.78 @ 10 | 0.41 | 0.1 M KOH /1600 | [15] |

**References**

1. Y.-X. Gao, Y. Wang, H. Liu, H.-Y. Xu, X.-P. Liu, Y.-C. Hua, C.-P. Li, J. Bai, J. Alloys Compd. **1010**, 178271 (2025)

2. Z. Lu, H. Zhou, B. Qian, S. Wang, Y. Zheng, L. Ge, H. Chen, Int. J. Hydrogen Energy **48**, 8082-8092 (2023)

3. S. G. Chandrappa, P. Moni, D. Chen, G. Karkera, K. R. Prakasha, R. A. Caruso, A. S. Prakash, J. Mater. Chem. A **8**, 20612-20620 (2020)

4. K. Li, J. Gao, X. Han, Q. Shao, Z. Lü, Journal of Energy Chemistry **96**, 669-678 (2024)

5. R. A. Afzal, K.-Y. Park, S.-H. Cho, N.-I. Kim, S. R. Choi, J. H. Kim, H.-T. Lim, J.-Y. Park, RSC Adv. **7**, 47643-47653 (2017)

6. Y. Zhu, W. Zhou, J. Yu, Y. Chen, M. Liu, Z. Shao, Chem. Mat. **28**, 1691–1697 (2016)

7. Z. Wu, L.-P. Sun, T. Xia, L.-H. Huo, H. Zhao, A. Rougier, J.-C. Grenier, J. Power Sources **334**, 86-93 (2016)

8. P. Li, B. Wei, Z. Lü, Y. Wu, Y. Zhang, X. Huang, Appl. Surf. Sci. **464**, 494-501 (2019)

9. U. Bhardwaj, A. Sharma, A. Mathur, A. Halder, H. S. Kushwaha, Energy Storage **4**, e293 (2021)

10. H. Sun, G. Chen, Y. Zhu, B. Liu, W. Zhou, Z. Shao, Chem. Eur. J. **23**, 5722-5728 (2017)

11. K. J. May, C. E. Carlton, K. A. Stoerzinger, M. Risch, J. Suntivich, Y.-L. Lee, A. Grimaud, Y. Shao-Horn, J. Phys. Chem. Lett. **3**, 3264-3270 (2012)

12. M. Prabu, P. Ramakrishnan, P. Ganesan, A. Manthiram, S. Shanmugam, Nano Energy **15**, 92-103 (2015)

13. M. Y. Oh, J. S. Jeon, J. J. Lee, P. Kim, K. S. Nahm, RSC Adv. **5**, 19190-19198 (2015)

14. Z. Du, P. Yang, L. Wang, Y. Lu, J. B. Goodenough, J. Zhang, D. Zhang, J. Power Sources **265**, 91-96 (2014)

15. D. U. Lee, M. G. Park, H. W. Park, M. H. Seo, V. Ismayilov, R. Ahmed, Z. Chen, Electrochem. Commun. **60**, 38-41 (2015)
